# Supplementary material
Source: Elsevier journal article supplement (https://www.sciencedirect.com/science/article/pii/S0121812321000086)
Supplement: mmc2 [file S0121812321000086:mmc2.xlsx]

## Sheet: Supplementary Table
Supplementary Table. Complete description of KD cases in Colombia (literature review).a
Authors	Patients, n	Age			Sex, n		Clinical classification, n						Time from onset of symptoms to diagnosis	Clinical findings
														Main clinical findings									Other clinical findings
							AHA criteria			JCS criteria													Vital signs				Constitutional						Respiratory					Cardiovascular		Gastrointestinal				Neurologic	Musculoskeletal		Dermatologic		Others
		Mean (or others)	Minimum	Maximum	Male	Female	C	I	N	C	I	N		Persistent fever, n	Duration of feverb	Peripheral extremities involvement, n	Oral and pharyngeal mucosal changes, n	Cervical lymphadenopathy, n	Conjunctival injection, n	Rash, n	Rash description	Rash location	Tachycardia, n	Hypotension, n	Hypoxemia, n	Tachypnea, n	Hiporexia or anorexia, n	Asthenia or adynamia, n	Irritability, n	Malaise, n	Generalized pain, n	Jaundice, n	Cough, n	Pulmonary findings, n	Odynophagia, n	Rhinorrhea or rhinitis, n	Respiratory distress, n	Murmur, n	Gallop rythm, n	Diarrhea or diarrheal stool, n	Nausea and/or vomiting, n	Abdominal pain, n	Hepatomegaly, n	Headache, n	Myalgias, n	Arthralgias, n	Desquamation or sloughing (other than extremities), n	Diaper dermatitis, n	Non-cervical lymphadenopathy, n
Anzola et al.1	14	20 mo	2 mo	48 mo	6	8	NA	NA	NA	NA	NA	NA	NA	NA	NA	NA	NA	NA	NA	NA	NA	NA	NA	NA	NA	NA	NA	NA	NA	NA	NA	NA	NA	NA	NA	NA	NA	NA	NA	NA	NA	NA	NA	NA	NA	NA	NA	NA	NA
Baquero et al.2	20	< 1 y: 8 patients	3 mo	8 y	13	7	19	1	0	19	NA	NA	Median: 5 d	18	NA	0	0	0	0	5	NA	NA	1	0	0	0	0	0	0	0	0	0	4	5	0	0	0	0	0	10	0	0	4	0	0	0	0	0	0
Bolaños et al.3	4	1,75 y	1 y	3 y	4	0	2	2	0	2	2	0	NA	4	≥ 2 d: 1 patient ≥ 3 d: 1 patient ≥ 5 d: 2 patients	3	4	2	2	3	-Polymorphic: 2 patients -Papular: 1 patient -Maculopapular, erythematous: 1 patient	-Generalized: 1 patients -Legs: 1 patient	0	0	0	0	1	0	0	0	0	0	0	0	0	0	0	0	0	1	1	0	0	0	0	0	0	0	0
Carrillo4	8	27,5 mo	8 mo	9 y	4	4	6	2	0	6	2	0	NA	8	≥ 5 d: 8 patients	6	8	4	6	7	Polymorphic?: 7 patients	NA	1-8d	0	0	0	1-8d	1-8d	0	0	0	0	0	0	0	0	0	0	0	1-8d	1-8d	1-8d	0	1-8d	0	0	1-8d	0	0
Castillo et al.5	7	< 5 y: 7 (7-12 mo: 3 patients)			4	3	7	0	0	7	0	0	NA	6	≥ 5 d: 7 patients	5-7e	4-6e	3	2	4	NA	NA	NA	NA	NA	NA	NA	NA	NA	NA	NA	NA	NA	NA	NA	NA	NA	NA	NA	NA	NA	NA	NA	NA	NA	NA	NA	NA	NA
Chalem et al.6	1	15 y			1	0	1	0	0	1	0	0	NA	1	≥ 5 d	1	1	0	0	1	Maculopapular	Generalized	0	0	0	0	0	1	0	0	0	0	0	0	0	0	0	0	0	0	0	0	0	0	0	0	0	0	0
Chan et al.7	1	7 m			1	0	0	0	1	0	1	0	18 d	0f	NA	1	1	1	0	1	Macular; erythematous	Maxilar; generalized	0	0	0	0	0	0	0	0	0	0	0	0	0	0	0	0	0	0	0	0	0	0	0	0	0	0	1
Dominguez et al.8	1	3 y			0	1	1	0	0	1	0	0	NA	1	≥ 6 d	1	1	1	1	1	NA	Generalized	0	0	0	0	0	0	0	1	0	0	0	0	0	0	0	0	0	0	0	0	0	0	0	0	0	0	0
Guzman et al.9	1	36 y			1	0	1	0	0	1	0	0	NA	1	≥ 5 d	1	1	0	1	1	Maculopapular	Extremities and trunk	1	1	0	0	0	0	0	0	0	0	0	0	1	0	0	0	0	0	1	0	0	1	0	0	0	0	1
Henao et al.10	1	12 y			1	0	0	1	0	0	1	0	21 d	1	21 d	1	0	0	1	1	Maculopapular, erythematous	Extremities and trunk	0	0	0	0	0	1	0	1	0	1	1	0	0	0	0	0	0	0	0	1	1	1	1	1	0	0	0
Jaramillo et al.11	4	42,24 mo	9 mo 30 d (9,97 mo)	7 y	2	2	2	2	0	2	2	0	15 d: 1	4	≥ 4 d: 1 patient ≥ 7 d: 2 patient ≥ 8 d: 1 patient	3	4	3	3	2	-Morbiliform, pruritic: 1 patient -Micropapular: 1 patient	Generalized: 2 patients	2		1	1	1	2	1	0	0	0	1	2	0	1	0	1	0	0	0	0	0	0	0	0	2	0	0
Matíz et al.12	1	4 y			1	0	0	1	0	0	1	0	11 d	1	11 d	1	1	0	0	1	Maculopapular, pruritic	Axillae, inguinal region, abdomen, feet	0	0	0	0	0	0	0	0	0	0	0	0	0	0	0	0	0	0	1	0	0	0	0	0	0	0	0
Ocampo et al.13	1	11 mo			0	1	1	0	0	1	0	0	7 d	1g	3 d	1	1	1	1	1	Urticaria-like	Extremities, trunk and face	0	0	0	0	0	1	1	0	0	0	0	0	0	0	0	0	0	1	0	0	0	0	0	0	0	0	0
Pinzón et al.14	1	4 mo			0	1	0	1	0	0	1	0	NA	1h	7 d	0	1	0	1	1	NA	Generalized	0	0	0	0	0	0	0	0	0	0	0	0	0	0	0	0	0	1	0	0	0	0	0	0	0	0	0
Trujillo et al.15	2	79,5 mo	15 mo	12 y	1	1	1	1	0	1	1	0	Mean: 3,5 d (1-6)	2	≥ 5 d: 1 patient ≥ 6 d: 1 patient	2	0	1	2	2	-Patchy (abdomen and extremities): 1 patient -Scarlet fever-like, puritic; hives; miliaria-like, pruritic: 1 patient	-Generalized: 1 patient -Upper extremities (hives): 1 patient	0	0	0	0	1	1	1	0	1	1	0	0	0	1	0	0	1	0	1	1	0	1	0	0	0	0	0
Vallejo16	5i	1,75 y	9 mo	4 y	3	2	2	3	0	2	1	2	NA	5	≥ 3 d: 1 patient ≥ 5 d: 1 patient ≥ 6 d: 2 patients ≥ 9 d: 1 patient	2	4	2i	4	4	Maculopapular: 1 patient	-Generalized: 2 patients -Thorax: 1 patient -Lower extremities, thorax, genital area: 1	2	0	0	4	0	0	3	0	0	0	0	0	0	3	1	1	0	2	1	0	0	0	0	0	1	1	1
Zapata-Castellanos et al.17	48	29,6 mo	3 mo	119 mo	32	16	42	6	0	42	NA	NA	Mean: 10,5 d / median: 7 d (3-44) (> 10 d: 35%)	48	≥ 5 d: 48 patients	39	43	25	43	44	NA	NA	Atypical manifestations (seizures, orchytis, pneumonia, hemolytic anemia, dactilitis, oligoarthritis with functional impairment and severe pain): 7
AHA American Heart Association, ALP alkaline phosphatase, ASA acetylsalicylic acid, C complete form, CAAs coronary artery aneurysms, CALs coronary artery lesions, CRP C reactive protein, EF ejection fraction, ESR erythrocyte sedimentation rate, GGT g-glutamyl transferase, I incomplete form, IVIG intravenous immunoglobulin, JCS Japanese Circulation Society, KD Kawasaki disease, N did not meet thes…
a We could not completely exclude a possible overlapping of cases10,11,15,17.
b Some studies do not specify the total duration of fever, but only report the duration of fever at presentation or admission.
c Six patients showed echochardiographic changes, but it is not clear if echocardiogram was performed in just these or more patients.
d The precise number of patients presenting these clinical findings is not described.
e It was not possible to definitely rule out an overlap of these findings in the reported patients.
f A single episode of fever, just one day.
g This patient was diagnosed with 3 days of evolution of symptoms (fever).
h This patient presented an intermittent fever.
i One patient did not meet diagnostic criteria (case 2) and another one (case 3) disclosed with occipital adenopathies.
References 1. Anzola LK, Manrique MC, Bernal-Moreno MR. Hallazgos imagenológicos en la perfusión miocárdica con isonitrilos con SPECT en pacientes con diagnóstico de enfermedad de Kawasaki en las Clínicas Colsanitas de Bogotá. Rev Médica Sanitas. 2014;17:136–42. 2. Baquero R, Tuesca R, Muñoz C, Pérez J, Molina T, Bustamante MC. Enfermedad de Kawasaki en niños hospitalizados en cinco centros de Ba…
[truncated: 52 more columns]
